# Supplementary material for: Uremic Toxin Indoxyl Sulfate Promotes Macrophage-Associated Low-Grade Inflammation and Epithelial Cell Senescence
Source: MDPI journal article supplement (doi:10.3390/ijms24098031), 2023-04-28
Supplement: s1 [file s1]

Figure S5

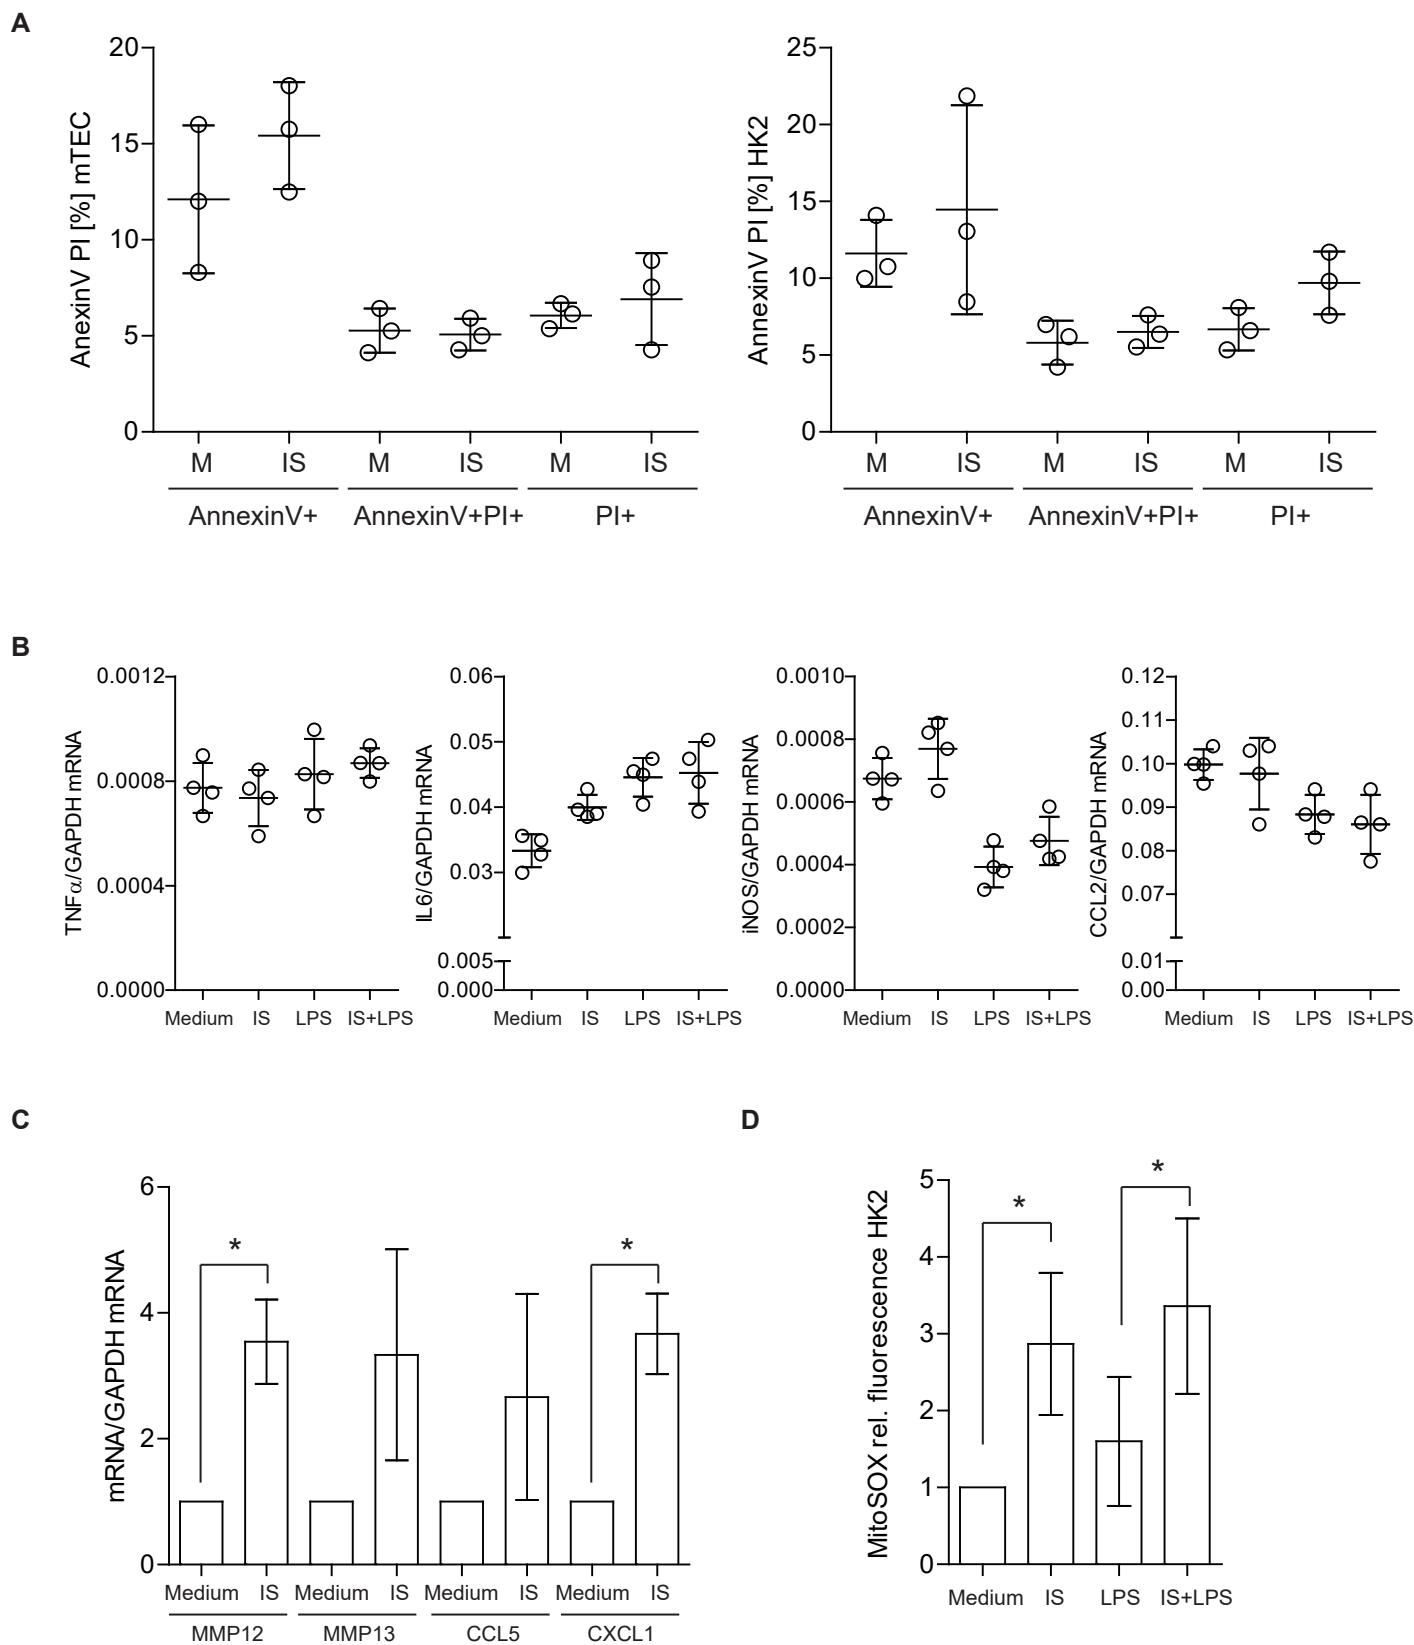

Figure S5. Indoxyl sulfate affects inflammatory responses of tubular epithelial cells. (A) Annexin V and PI staining of epithelial cells. We cultured the cells in medium containing 60 $\mu$ g/ml indoxyl sulfate (IS) for 24 h. (B) The mRNA expression levels of genes in epithelial cells; we cultured the cells in medium containing 60 $\mu$ g/ml indoxyl sulfate (IS) and stimulated them with LPS (100 ng/mL) for 4h. (C) Figure shows the mRNA expression levels of senescence-associated genes in HK2. (D) Mitochondrial superoxide production was detected with MitoSOX and presented as MFI fold induction. Data are shown as means  $\pm$  SD. \*  $p < 0.05$ .
