# Supplementary material for: Uremic Toxin Indoxyl Sulfate Promotes Macrophage-Associated Low-Grade Inflammation and Epithelial Cell Senescence
Source: MDPI journal article supplement (doi:10.3390/ijms24098031), 2023-04-28
Supplement: s1 [file s1]

Figure S1

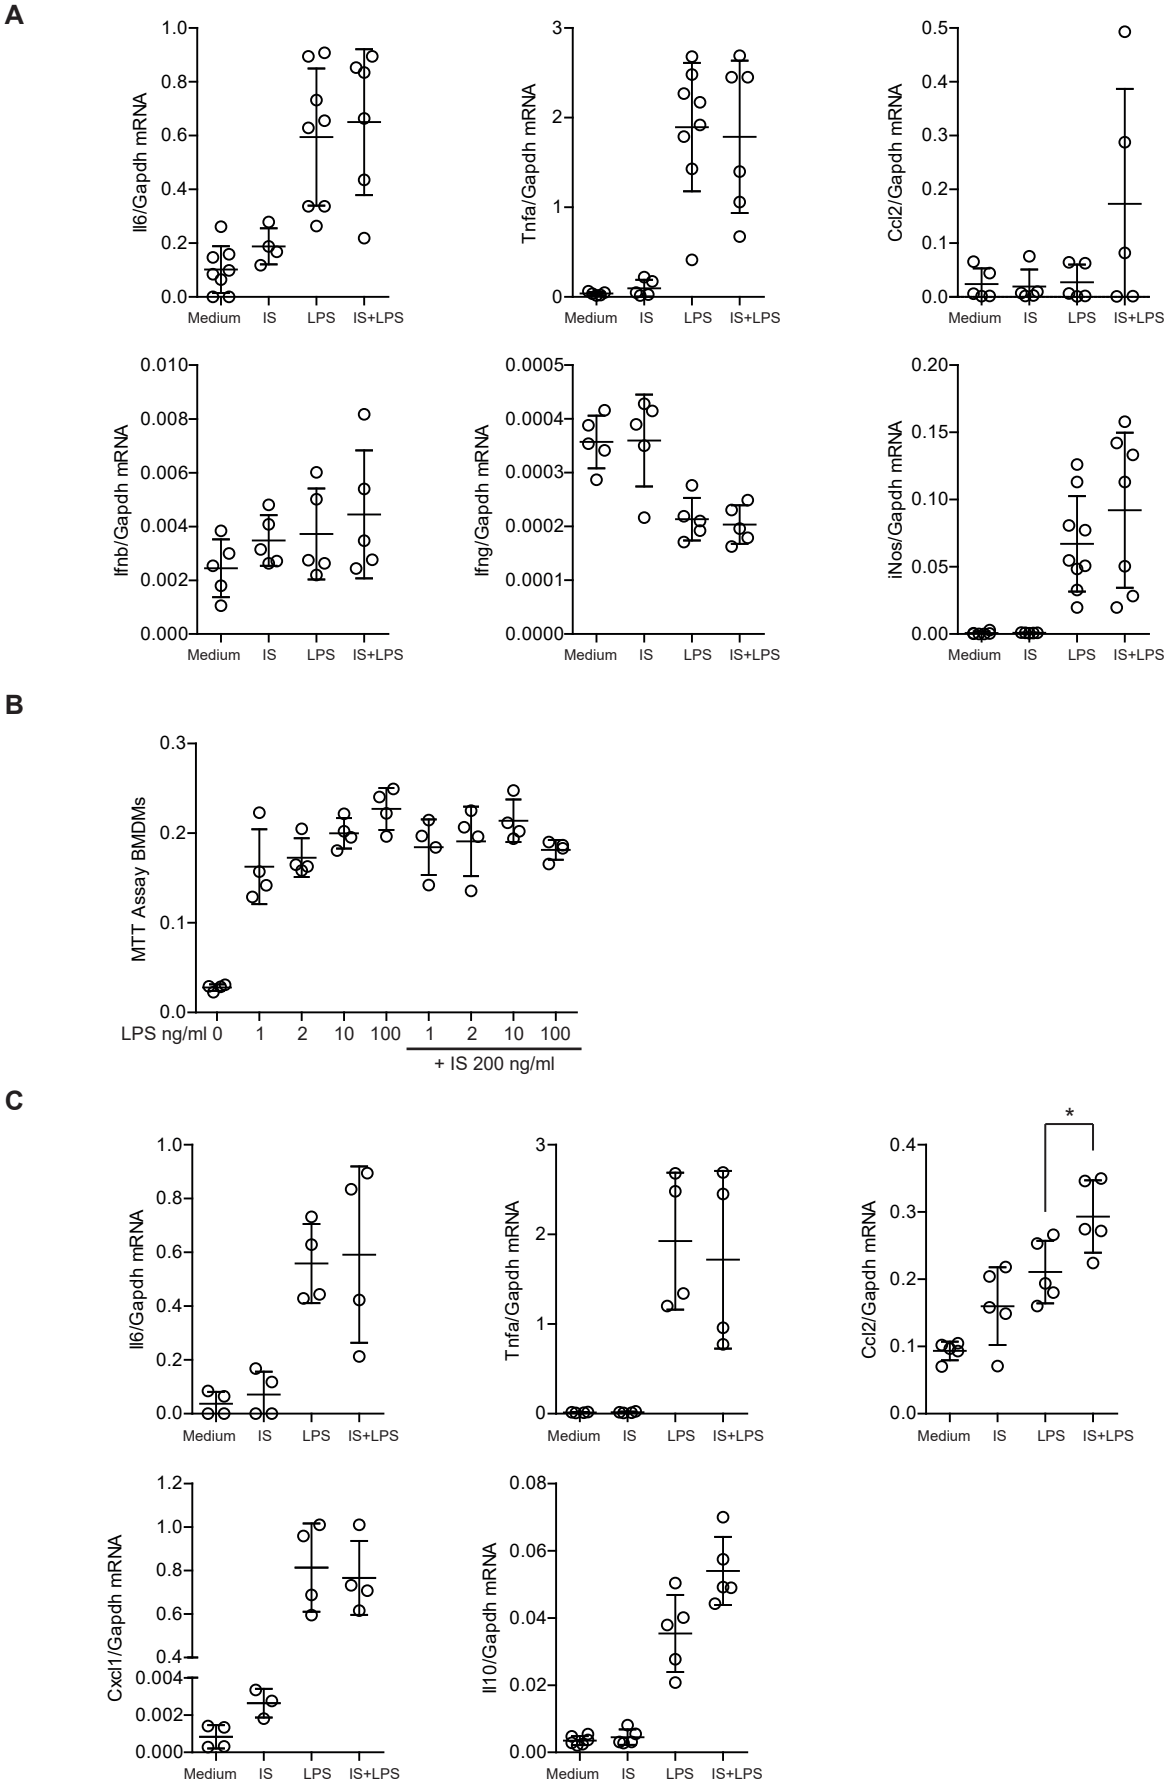

Figure S1. Low concentrations of IS do not significantly affect metabolic activity and inflammatory gene expression in BMDM (A) The mRNA expression levels of genes in bone marrow-derived macrophages (BMDM); we cultured the cells in medium containing 200 ng/ml indoxyl sulfate (IS) and stimulated them with LPS (2 ng/mL) for 4h. (B) The viability and metabolic activity of BMDM was measured using MTT assay upon LPS stimulation (1-100 ng/mL) and in the absence and the abundance of IS. (C) The mRNA expression levels of genes in BMDM; we cultured the cells in medium containing 10  $\mu$ g/ml indoxyl sulfate (IS) and stimulated them with LPS (2 ng/mL) for 4h. Data are shown as means  $\pm$  SD. \*  $p < 0.05$ .
