# Supplementary material for: Uremic Toxin Indoxyl Sulfate Promotes Macrophage-Associated Low-Grade Inflammation and Epithelial Cell Senescence
Source: MDPI journal article supplement (doi:10.3390/ijms24098031), 2023-04-28
Supplement: s1 [file s1]

Figure S2

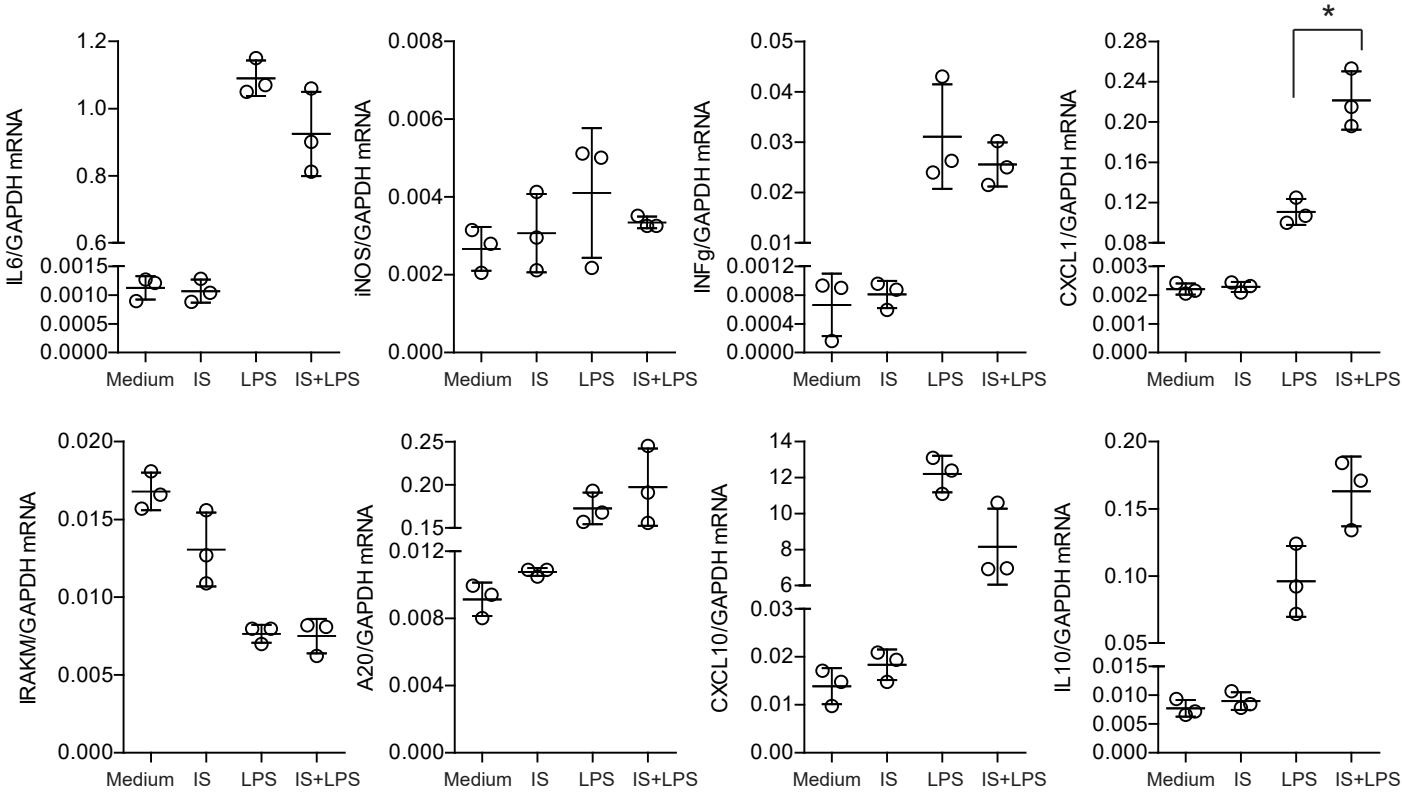

Figure S2. Indoxyl sulfate affect inflammatory gene expression in PBMCs. The mRNA expression levels of genes in PBMCs; we cultured the cells in medium containing 60µg/ml indoxyl sulfate (IS) and stimulated them with LPS (2 ng/mL) for 4h. Data are shown as means ± SD. \* p < 0.05.
