# Supplementary material for: Uremic Toxin Indoxyl Sulfate Promotes Macrophage-Associated Low-Grade Inflammation and Epithelial Cell Senescence
Source: MDPI journal article supplement (doi:10.3390/ijms24098031), 2023-04-28
Supplement: s1 [file s1]

Supplementary Table S1. Sequence of primers used for RT-PCR studies.

| Primer name     | Accession Nr. | Sequence_Fw             | Sequence_Rv              |
|-----------------|---------------|-------------------------|--------------------------|
| <i>A20</i>      | NM_009397     | AAGCTCGTGGCTCTGAAAAC    | TTCCTCAGGACCAGGTCAGT     |
| <i>Ahr</i>      | NM_013464     | CTGGTTGTCACAGCAGATGCCT  | CGGTCTTCTGTATGGATGAGCTC  |
| <i>Areg</i>     | NM_009704     | GCAGATACATCGAGAACCTGGAG | CCTTGTCATCCTCGCTGTGAGT   |
| <i>Armcx3</i>   | NM_027870     | GTGAATGCCGAAAATCAGCGCAG | GGTAAGCAATCTGAGTCCAGCC   |
| <i>Ccl2</i>     | NM_011333     | GCTACAAGAGGATCACCAGCA   | GTCTGGACCCATTCTTCTTG     |
| <i>Ccl5</i>     | NM_013653     | CCACTTCTTCTCTGGGTTGG    | GTGCCACGTCAAGGAGTAT      |
| <i>Cdkn1a</i>   | NM_007669     | GCAGAATAAAAGTGCCACAGG   | AAAGTTCCACGTTCTCGGG      |
| <i>Cdkn2a</i>   | NM_001040654  | TGTTGAGGCTAGAGAGGATCTTG | CGAATCTGCACCGTAGTTGAGC   |
| <i>Ctnnb1</i>   | NM_001165902  | GTTTCGCTTCATTATGGACTGCC | ATAGCACCTGTTCCCGCAAAG    |
| <i>Cxcl1</i>    | NM_008176     | ACCCAAACCGAAGTCATAGCC   | CTCCGTTACTTGGGGACACC     |
| <i>Cyld</i>     | NM_001128170  | CACCTACTGGGAAGAACGGA    | ACGGTCTTGATGTACTGTCCTATA |
| <i>Dok1</i>     | NM_001291799  | TTTTCTGCCTTGAGATGCT     | GCTCCAGGATTTGACTCTGC     |
| <i>Dok2</i>     | NM_010071     | ATGGTCAGGATGGAGGAGC     | ATATAACACGGCTGCGAACC     |
| <i>Dsp</i>      | NM_023842     | TACACCTCAGGGCTGGAACTC   | GTAGTCTCCAGACCTCGTAAGC   |
| <i>Duba</i>     | NM_138604     | AGCGGGCTACAACAGTGAAG    | AAGGCCTTTTCAAACCAAGT     |
| <i>Erbin</i>    | NM_001289473  | GCCCTGAGACACCCTGAGA     | CAACCGCACAAACAACTTC      |
| <i>Errfi1</i>   | NM_133753     | GCCTACAATCTGAACCTCCCTG  | CCTTGGAGATGGACCACACTCT   |
| <i>Gdf15</i>    | NM_011819     | AGCCGAGAGGACTCGAACTCA   | GGTTGACGCGGAGTAGCAGCT    |
| <i>Glb1</i>     | NM_009752     | CAAGACAGTGGCTGAAGCTCTG  | GAGGAAGCGTTGTTCCGTACAG   |
| <i>Il6</i>      | NM_031168     | TGATGCACTTGACAGAAAACA   | ACCAGAGGAAATTTCAATAGGC   |
| <i>Il10</i>     | NM_010548     | ACAGCCGGGAAGACAATAACT   | CCTGCATTAAGGAGTCGGTTA    |
| <i>iNos</i>     | NM_010927     | TTCTGTGCTGTCCAGTGAG     | TGAAGAAAACCCCTTGTGCT     |
| <i>IrakM</i>    | NM_028679     | CACTGCTGGGAGAGCTTTG     | CCAGCCAGCTGTTTGAAAGT     |
| <i>Irf4</i>     | NM_013674     | TGCAAGCTCTTTGACACACA    | CAAAGCACAGAGTCACCTGG     |
| <i>Lancl1</i>   | NM_021295     | CTCCTGAGTTCTCACATCGCTTG | GGTGGAGGTAAAGCACAGCGAT   |
| <i>Ly6d</i>     | NM_010742     | CATGCTTTAGCCATGATGGAGGC | ATGTCATCAGCTCTTGGTGCCC   |
| <i>Mcpip1</i>   | NM_153159     | CCTGTGGTCATCGACGGAAG    | GAAGGATGTGCTGGTCTGTGATA  |
| <i>Muc1</i>     | NM_013605     | AGTGCTCTGACGTGAAGTCAC   | GGGAGGGAACTGCATCTCATTC   |
| <i>Nox4</i>     | NM_015760     | CGGGATTGCTACTGCCTCCAT   | GTGACTCCTCAAATGGGCTTCC   |
| <i>Otud7b</i>   | NM_001025613  | GGAGGTGAAGTTACATCTGCTGC | TCAGGAGTGGACCTGGGTTTCAT  |
| <i>Pias4</i>    | NM_021501     | CCAACCGCATTACTGTCACCTG  | CGTCTTCAACCTCTGTAGCAGG   |
| <i>Prodh</i>    | NM_011172     | ATCGCATCCAGGGCTGAGATTG  | GTCAATGAGGCTGTCCAGTCC    |
| <i>S100a9</i>   | NM_001281852  | TGGTGGAAGCACAGTTGGCAAC  | CAGCATCATACACTCTCAAAGC   |
| <i>Ship</i>     | NM_010566     | GCTGTTCCGGAATTGTGTTT    | GTGAAGAACCTCATGGGGAC     |
| <i>Sigirr</i>   | NM_023059     | AGAGGTCCAGAAAGAGCCAT    | ACACTGGGGCTAGAGAACA      |
| <i>Sike1</i>    | NM_025679     | TTCAGGTGGACGATAACCAA    | GAGATTCACTGCTGATGGACAG   |
| <i>Slc9a3r1</i> | NM_012030     | ATCTGCCTCCAGCGATACCAGT  | AGCCAAGGAGATGTTGAGGTCC   |
| <i>Slc22a6</i>  | NM_008766     | GAAAGGCTGTCTGGCTTCTCT   | ATCAGTGGGCTCACTATGCTGC   |
| <i>Slc22a8</i>  | NM_031194     | AGGCTCTGAAGACACTCCAACG  | ACCTTGGCTGAGGTGATGTCCT   |
| <i>Smurf2</i>   | NM_025481     | CCAATGCCATCAACCGCCTCAA  | GTGCCTATTCCGGTCTCTGGACT  |
| <i>Snx14</i>    | NM_172926     | GTGGCTGAAGGCGAAGATGACT  | CGAGGAGTGTTAGGTGTGCTCA   |
| <i>Socs1</i>    | NM_001271603  | ACTTCTGGCTGGAGACCTCA    | ACAAGCTGCTACAACCAG       |
| <i>Socs3</i>    | NM_007707     | AAGGCCGGAGATTTCGCT      | AACTTGCTGTGGGTGACCAT     |
| <i>Stx4a</i>    | NM_009294     | GTCCAGCAATTTGTCGAGCTC   | TCCTCGTCAGACACCATTCAG    |
| <i>Tank</i>     | NM_001164071  | GCTTCCAGAATGGGTACGTG    | TGGTAGGAATGCCAGCTCTC     |
| <i>Tgfb</i>     | NM_011577     | GGAGAGCCCTGGATACCAAC    | CAACCCAGGTCCTTCTCTAAA    |
| <i>Tnfa</i>     | NM_013693     | AGGGTCTGGGCCATAGAAGT    | CCACCAGCTCTTCTGTCTAC     |
| <i>Tollip</i>   | NM_001347562  | GCGGGTCTCTGTGCAGTT      | TGTGGGTGTTATACGGAGGAA    |
| <i>Trim32</i>   | NM_001161782  | GAAACAGCGGAGTTCTGAGGCA  | AACCAGCACCTCACTCTGACTG   |

|                |              |                         |                        |
|----------------|--------------|-------------------------|------------------------|
| <i>Tslp</i>    | NM_021367    | GCAAATCGAGGACTGTGAGAGC  | TGAGGGCTTCTCTTGTCTCCG  |
| <i>Twist1</i>  | NM_011658    | GATTCAGACCCTCAAAGTGGCG  | AGACGGAGAAGGCGTAGCTGAG |
| <i>Vamp3</i>   | NM_009498    | AGACCAGAAGCTCTCGGAGCTA  | ACCAGGACACTGATCCCTATCG |
| <i>Zranb1</i>  | NM_207302    | GGCTATTCCTCAATGCCTGTGTG | AGAAGGACGGTTCAGCAAGCGT |
| <i>hA20</i>    | NM_001270507 | GGACTTTGCGAAAGGATCG     | TCACAGCTTTCGCATATTG    |
| <i>hCCL2</i>   | NM_002982    | AGAATCACCAGCAGCAAGTGTCC | TCCTGAACCACTTCTGCTTGG  |
| <i>hCCL5</i>   | NM_002985    | CCTGCTGCTTTGCCTACATTGC  | ACACACTTGGCGGTTCTTTCGG |
| <i>hCXCL1</i>  | NM_001511    | AGCTTGCCTCAATCCTGCATCC  | TCCTTCAGGAACAGCCACCAGT |
| <i>hIL-6</i>   | NM_000600    | AGTGAGGAACAAGCCAGAGC    | GTCAGGGGTGGTTATTGCAT   |
| <i>hINOS</i>   | NM_000625    | GCTCTACACCTCCAATGTGACC  | CTGCCGAGATTGAGCCTCATG  |
| <i>hMCPIP1</i> | NM_025079    | AAGAGGAAAAGGAGGGGCAGC   | ATGTGCTGGTCTGTGATGGG   |
| <i>hTNFa</i>   | NM_000594    | CTCTTCTGCCTGCTGCACTTTG  | ATGGGCTACAGGCTTGCTACTC |
