# Supplementary material for: Uremic Toxin Indoxyl Sulfate Promotes Macrophage-Associated Low-Grade Inflammation and Epithelial Cell Senescence
Source: MDPI journal article supplement (doi:10.3390/ijms24098031), 2023-04-28
Supplement: s1 [file s1]

Figure S7

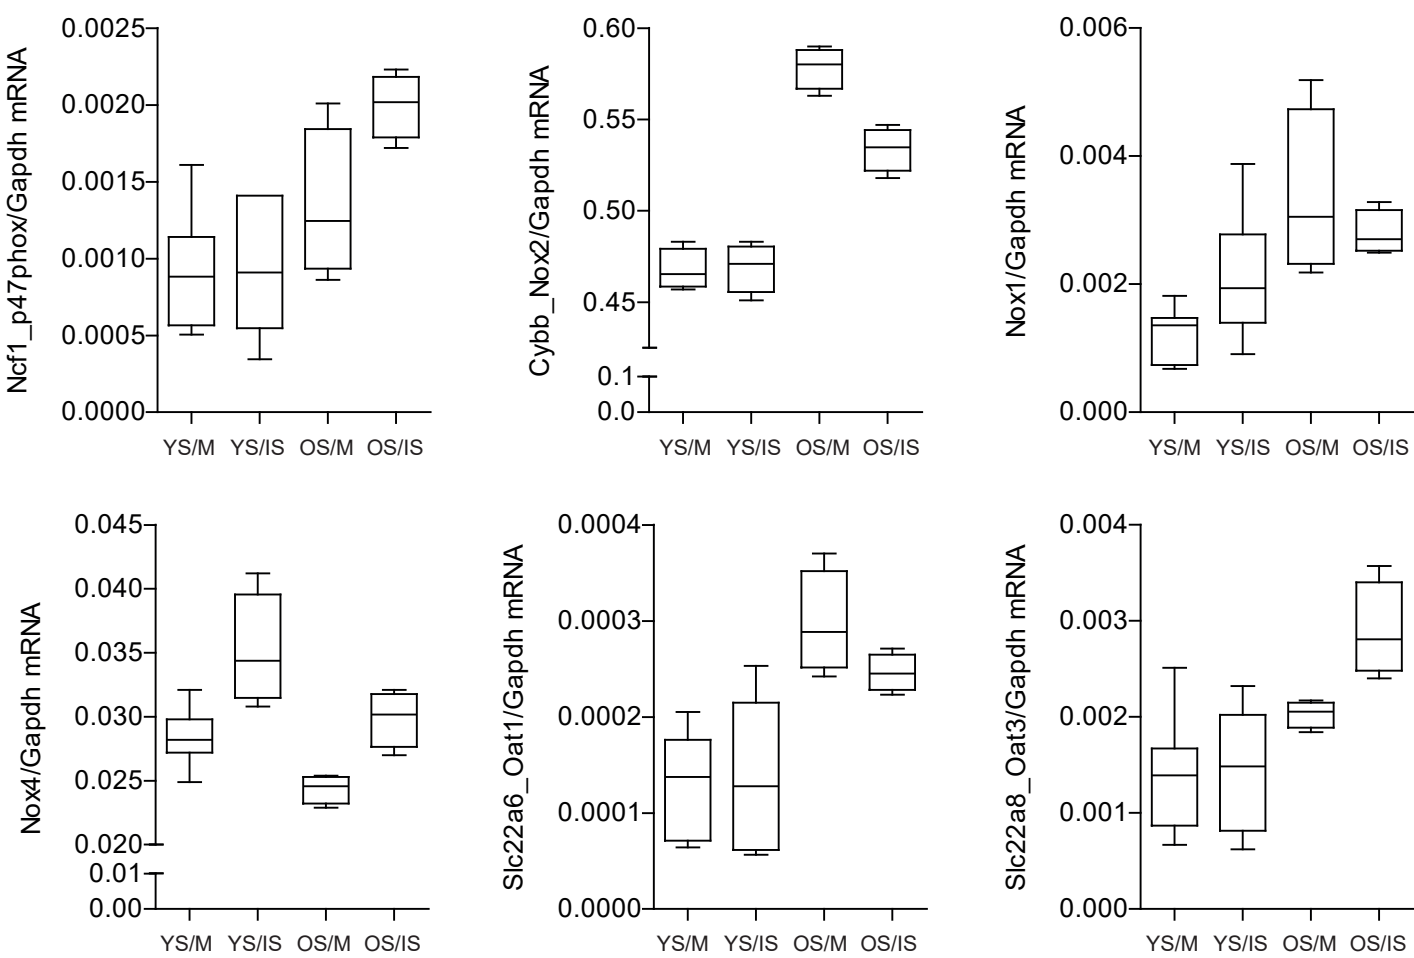

Figure S7. Indoxyl sulfate and ROS-related gene expression in tubular epithelial cells. Figure shows the mRNA expression levels of ROS-associated genes in tubular epithelial cells
