# Supplementary material for: Uremic Toxin Indoxyl Sulfate Promotes Macrophage-Associated Low-Grade Inflammation and Epithelial Cell Senescence
Source: Int J Mol Sci. 2023 Apr 28;24(9):8031. doi: 10.3390/ijms24098031 (PMC10179130; doi:10.3390/ijms24098031)
Supplement: Supplementary file 1 [file ijms-24-08031-s001.zip]

Archive with 8 entries (8 files):
- ijms-2345636-supplementary/Supplementary Figure S1.pdf
- ijms-2345636-supplementary/Supplementary Figure S2.pdf
- ijms-2345636-supplementary/Supplementary Figure S3.pdf
- ijms-2345636-supplementary/Supplementary Figure S4.pdf
- ijms-2345636-supplementary/Supplementary Figure S5.pdf
- ijms-2345636-supplementary/Supplementary Figure S6.pdf
- ijms-2345636-supplementary/Supplementary Figure S7.pdf
- ijms-2345636-supplementary/Supplementary Table S1.pdf
