# Supplementary figures and images for: Uremic Toxin Indoxyl Sulfate Promotes Macrophage-Associated Low-Grade Inflammation and Epithelial Cell Senescence
Source: MDPI journal article supplement (doi:10.3390/ijms24098031), 2023-04-28

Figure S4

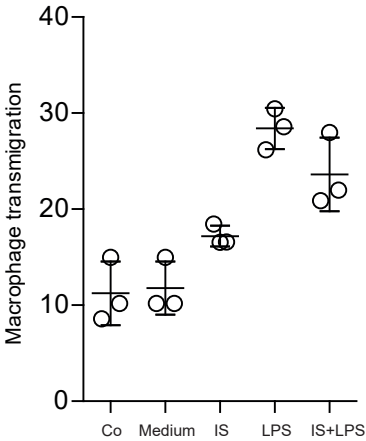

Figure S4. Indoxyl sulfate does not affect transmigration of BMDM.

Supplement: s1 [file s1]
